# Supplementary material for: Restored alveolar epithelial differentiation and reversed human lung fibrosis upon Notch inhibition
Source: bioRxiv or medRxiv preprint supplement (doi:10.1101/580498), 2019-03-23

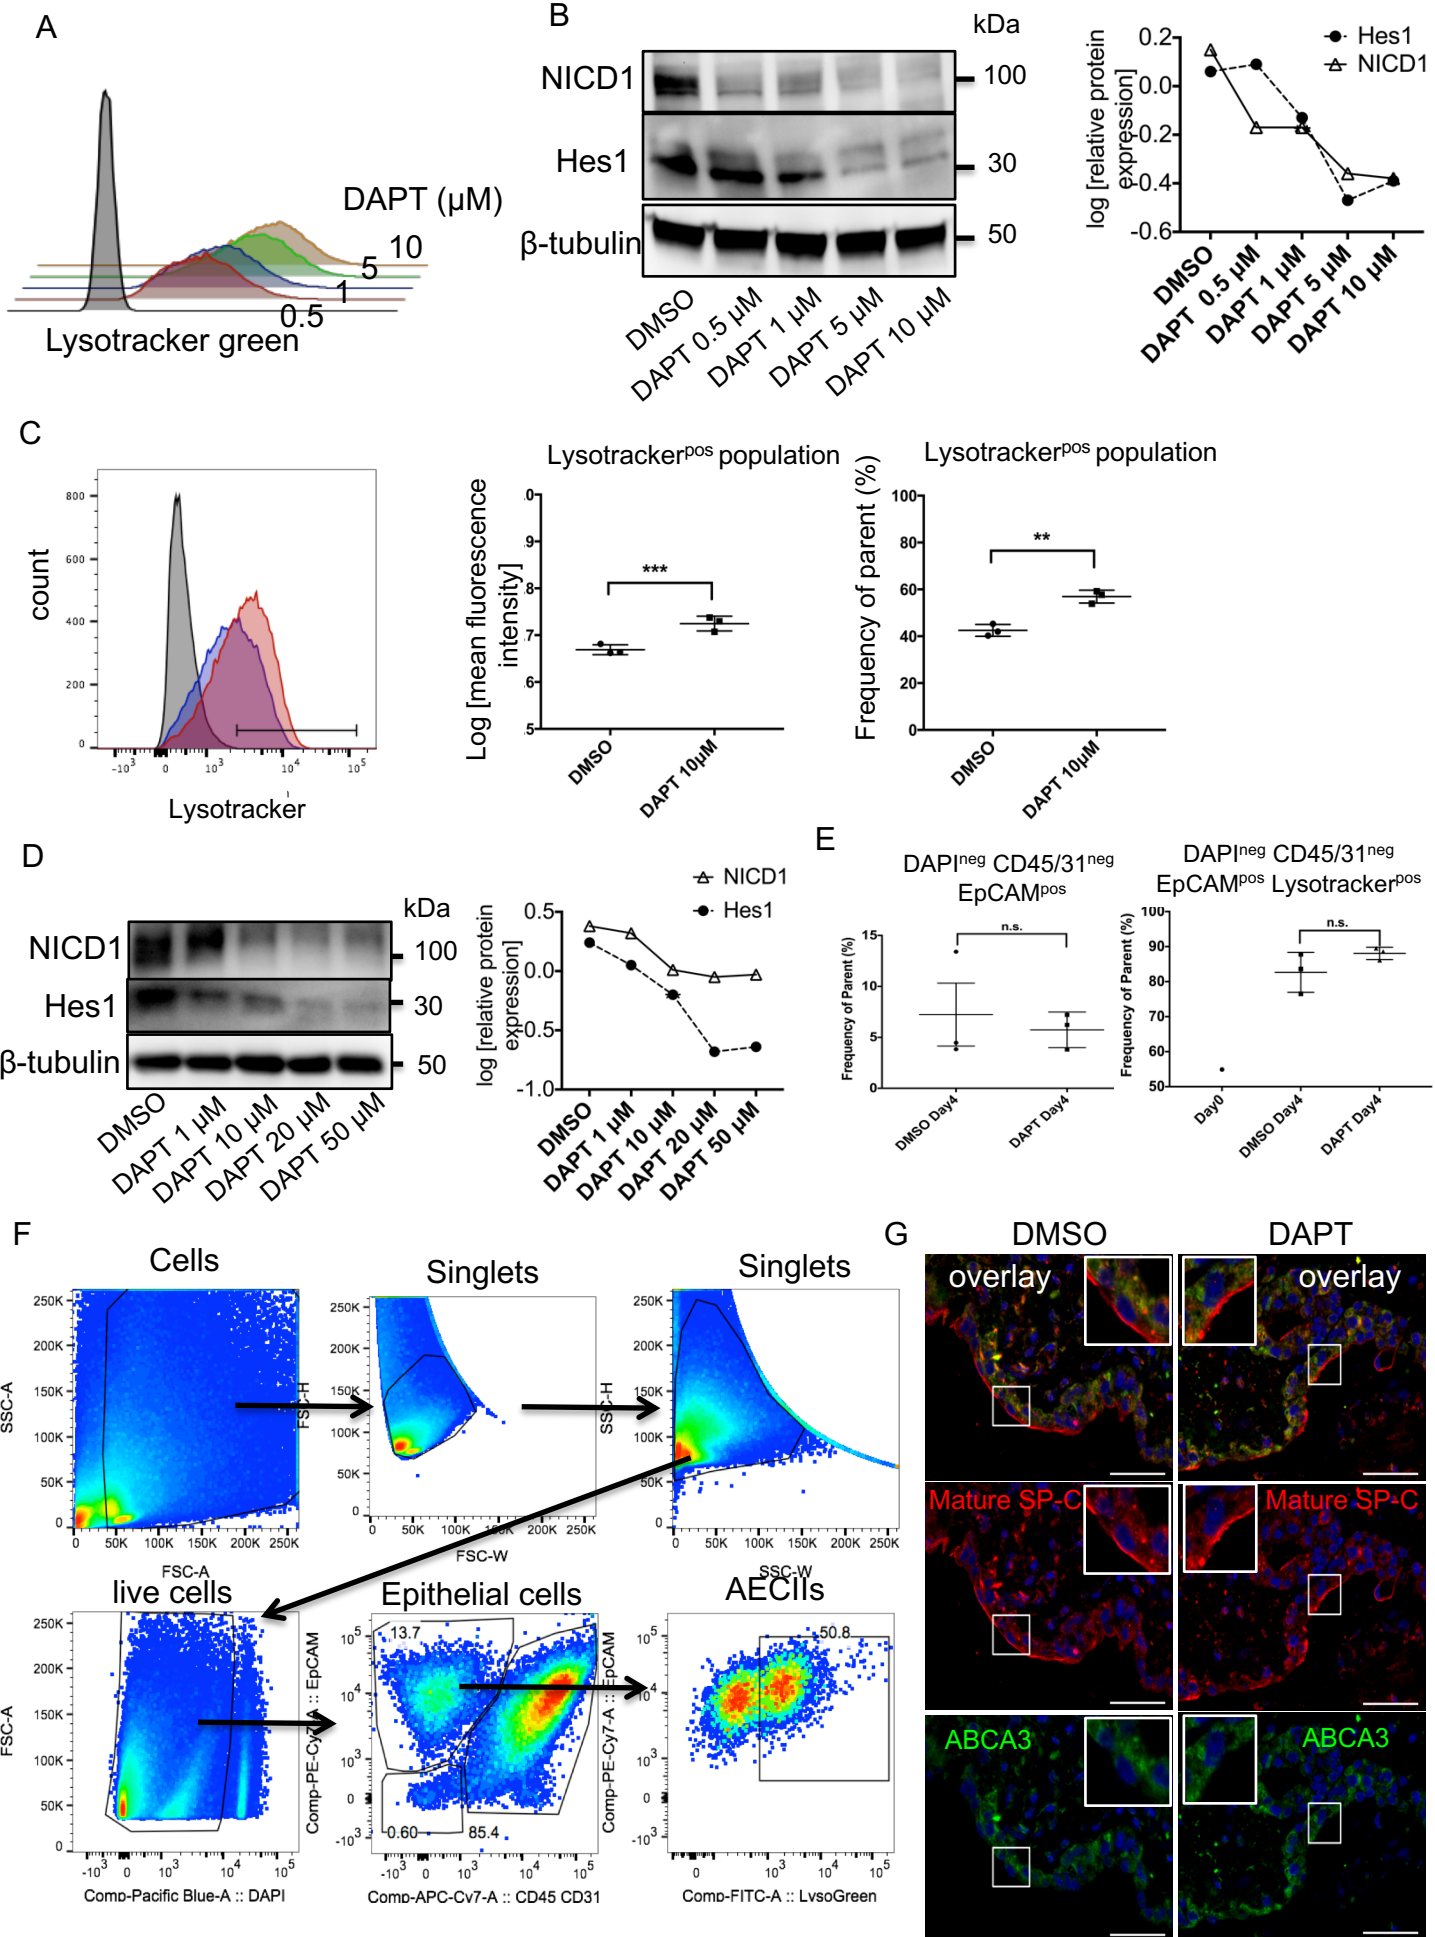

Supplement: Supplementary file [file media-6.pdf]
