# Supplementary material for: Restored alveolar epithelial differentiation and reversed human lung fibrosis upon Notch inhibition
Source: bioRxiv or medRxiv preprint supplement (doi:10.1101/580498), 2019-03-23
Supplement: Supplementary file [file media-9.pdf]

**Table S1.** Basic characteristics of the patients involved in our studies

| Patient category                           | n  | Age<br>(mean<br>± SEM) | Gender<br>(m/f) | FVC<br>(mean<br>± SEM) | FEV1<br>(mean<br>± SEM) | Smoking<br>status<br>%current/for<br>mer/ never | PY<br>(mean<br>± SEM) | UIP<br>pattern<br>(n/n open<br>biopsies) |
|--------------------------------------------|----|------------------------|-----------------|------------------------|-------------------------|-------------------------------------------------|-----------------------|------------------------------------------|
| Idiopathic Pulmonary Fibrosis              |    |                        |                 |                        |                         |                                                 |                       |                                          |
| IPF <sub>LTX</sub>                         | 47 | 54.4 ± 1.6             | 39/18           | 43.8 ± 2.5             | 48.6 ± 2.7              | 0/59/41                                         | 23.2 ± 5.6            | 47/47                                    |
| IPF <sub>VATS</sub>                        | 5  | 61.0 ± 1.9             | 3/2             | 61.1 ± 6.7             | 66.6 ± 6.2              | 0/60/40                                         | 15.0 ± 7.5            | 5/5                                      |
| IPF <sub>BALF</sub>                        | 10 | 64.7 ± 2.5             | 6/4             | 71.8 ± 7.7             | 75.1 ± 6.0              | 10/30/60                                        | 25.0 ± 17.5           | 5/5                                      |
| IPF <sub>Blood</sub>                       | 25 | 61.9 ± 2.7             | 17/8            | 61.2 ± 4.1             | 66.3 ± 4.9              | 4/28/68                                         | 19.8 ± 16.3           | 9/9                                      |
| Chronic Obstructive Lung Disease/Emphysema |    |                        |                 |                        |                         |                                                 |                       |                                          |
| COPD <sub>LTX</sub>                        | 9  | 55.2 ± 1.4             | 6/3             | 38.4 ± 3.0             | 17.0 ± 1.2              | 0/9/0                                           | 51.8 ± 7.7            | 0/9                                      |
| Control Subjects                           |    |                        |                 |                        |                         |                                                 |                       |                                          |
| Donors <sub>LTX</sub>                      | 43 | 47.0 ± 2.8             | 20/23           | n.a.                   | n.a.                    | n.a.                                            | n.a.                  | n.a.                                     |
| Healthy<br>volunteers <sub>BALF</sub>      | 8  | 24.8 ± 1.3             | 6/2             | 103.3 ± 2.6            | 106.7 ± 2.7             | 0/0/8                                           | 0                     | n.a.                                     |
| Healthy<br>volunteers <sub>Blood</sub>     | 50 | 34.4 ± 1.4             | 27/23           | n.a.                   | n.a.                    | n.a.                                            | n.a.                  | n.a.                                     |

*Abbreviations:* BALF = bronchoalveolar lavage fluid; FEV1 = forced expiratory volume after 1 sec; FVC = forced vital capacity; LTX = lung transplant; PY = pack years; n.a. = not applicable.

**Table S2. SFTPB, SFTPC, and NAPSA Genotyping in IPF patients and healthy controls**

| Gene         | Polymorphism  | [Allele type] | Controls (n = 50) | IPF (n = 36)<br>(11 IPF <sub>LTX</sub> +<br>25 IPF <sub>Blood</sub> ) |
|--------------|---------------|---------------|-------------------|-----------------------------------------------------------------------|
| <i>SFTPB</i> | I131T         | wt            | 11/50 (22%)       | 18/36 (50%)                                                           |
|              |               | heterozygous  | 28/50 (46%)       | 15/36 (42%)                                                           |
|              |               | homozygous    | 11/50 (22%)       | 3/36 (8%)                                                             |
|              | I102V         | wt            | 50/50 (100%)      | 35/36 (97%)                                                           |
|              |               | heterozygous  | 0/50 (0%)         | 1/36 (3%)                                                             |
|              |               | homozygous    | 0/50 (0%)         | 0/36 (0%)                                                             |
|              | E97E(gAg>gAA) | wt            | 50/50 (100%)      | 35/36 (97%)                                                           |
|              |               | heterozygous  | 0/50 (0%)         | 1/36 (3%)                                                             |
|              |               | homozygous    | 0/50 (0%)         | 0/36 (0%)                                                             |
|              | T16T(ACg>ACA) | wt            | 50/50 (100%)      | 35/36 (97%)                                                           |
|              |               | heterozygous  | 0/50 (0%)         | 1/36 (3%)                                                             |
|              |               | homozygous    | 0/50 (0%)         | 0/36 (0%)                                                             |
| <i>SFTPC</i> | T138N         | wt            | 25/50 (50%)       | 20/36 (56%)                                                           |
|              |               | heterozygous  | 21/50 (42%)       | 16/36 (44%)                                                           |
|              |               | homozygous    | 4/50 (8%)         | 0/36 (0%)                                                             |
|              | S186N         | wt            | 21/50 (42%)       | 15/36 (42%)                                                           |
|              |               | heterozygous  | 24/50 (48%)       | 16/36 (44%)                                                           |
|              |               | homozygous    | 5/50 (10%)        | 5/36 (14%)                                                            |
| <i>NAPSA</i> | I40T          | wt            | 24/50 (48%)       | 12/36 (33%)                                                           |
|              |               | heterozygous  | 21/50 (42%)       | 19/36 (53%)                                                           |
|              |               | homozygous    | 5/50 (10%)        | 5/36 (14%)                                                            |
|              | P255L         | wt            | 5/50 (10%)        | 5/36 (14%)                                                            |
|              |               | heterozygous  | 21/50 (42%)       | 19/36 (53%)                                                           |
|              |               | homozygous    | 24/50 (48%)       | 12/36 (33%)                                                           |
|              | A310T         | wt            | 41/50 (82%)       | 33/36 (92%)                                                           |
|              |               | heterozygous  | 9/50 (18%)        | 3/36 (8%)                                                             |
|              |               | homozygous    | 0/50 (0%)         | 0/36 (0%)                                                             |

For the allele type data, the frequency of two wild-type (wt) alleles, of a mutant and wild-type allele (heterozygous), and of two mutant alleles (homozygous) is shown.

**Table S3.** Top ten signaling pathways that are differentially regulated in the normal appearing septa from IPF patients versus donor septa and in fibrotic septa from IPF patients versus donor septa

| Normal Appearing Septa vs Donor Septa   |                                                | Fibrotic Septa vs Donor Septa  |                                                |
|-----------------------------------------|------------------------------------------------|--------------------------------|------------------------------------------------|
| Pathway                                 | [log p OR<br>log <sub>10</sub> p] <sup>a</sup> | Pathway                        | [log p OR<br>log <sub>10</sub> p] <sup>a</sup> |
| Neuroactive ligand-receptor interaction | 18.39                                          | AMPK signaling pathway         | 2.45                                           |
| Cytokine-cytokine receptor interaction  | 4.31                                           | TNF signaling pathway          | 1.94                                           |
| Jak-STAT signaling pathway              | 4.05                                           | Wnt signaling pathway          | 1.93                                           |
| ErbB signaling pathway                  | 2.75                                           | PI3K-Akt signaling pathway     | 1.42                                           |
| Cell adhesion molecules (CAMs)          | 2.40                                           | ErbB signaling pathway         | 1.39                                           |
| TGF-beta signaling pathway              | 2.38                                           | NF-kappa B signaling pathway   | 1.17                                           |
| ABC transporters                        | 2.13                                           | TGF-beta signaling pathway     | 1.17                                           |
| Notch signaling pathway                 | 2.04                                           | Hippo signaling pathway        | 1.15                                           |
| cAMP signaling pathway                  | 1.88                                           | Ras signaling pathway          | 1.11                                           |
| Ras signaling pathway                   | 1.69                                           | Cell adhesion molecules (CAMs) | 1.08                                           |

<sup>a</sup>p-values for each pathway were log transformed.

**Table S4.** Differentially regulated cellular processes in MLE12 Cells after 24 and 48 h of NICD1 upregulation

| Processes regulated only after 24 h                                                                                                                                                                                                                                                                                                                                                                                                                  | Processes regulated after 24 h and 48 h                                                                                                                                                                                                                                                                                                                                                                                                                                                                                                                                                                                                                                                                                                                                                                                                                                                                                  | Processes regulated only after 48 h                                                                                                                                                                                                                                                                                                                                                                                                                                                                                                                                                                                                                                                                                                                                                                                                                                                                                                                                                                                                                                                                                                                                                                                                                                                                                                                                                                                                                                                                           |
|------------------------------------------------------------------------------------------------------------------------------------------------------------------------------------------------------------------------------------------------------------------------------------------------------------------------------------------------------------------------------------------------------------------------------------------------------|--------------------------------------------------------------------------------------------------------------------------------------------------------------------------------------------------------------------------------------------------------------------------------------------------------------------------------------------------------------------------------------------------------------------------------------------------------------------------------------------------------------------------------------------------------------------------------------------------------------------------------------------------------------------------------------------------------------------------------------------------------------------------------------------------------------------------------------------------------------------------------------------------------------------------|---------------------------------------------------------------------------------------------------------------------------------------------------------------------------------------------------------------------------------------------------------------------------------------------------------------------------------------------------------------------------------------------------------------------------------------------------------------------------------------------------------------------------------------------------------------------------------------------------------------------------------------------------------------------------------------------------------------------------------------------------------------------------------------------------------------------------------------------------------------------------------------------------------------------------------------------------------------------------------------------------------------------------------------------------------------------------------------------------------------------------------------------------------------------------------------------------------------------------------------------------------------------------------------------------------------------------------------------------------------------------------------------------------------------------------------------------------------------------------------------------------------|
| <ul style="list-style-type: none"> <li>• Antigen processing and presentation</li> <li>• Atrazine degradation</li> <li>• Cell adhesion molecules (CAMs)</li> <li>• Cytokine-cytokine receptor interaction</li> <li>• Huntington's disease</li> <li>• Jak-STAT signaling pathway</li> <li>• Long-term depression</li> <li>• Melanogenesis</li> <li>• Natural killer cell mediated cytotoxicity</li> <li>• T cell receptor signaling pathway</li> </ul> | <ul style="list-style-type: none"> <li>• Acute myeloid leukemia</li> <li>• Adherens junction</li> <li>• Apoptosis</li> <li>• Axon guidance</li> <li>• Bladder cancer</li> <li>• Cell cycle</li> <li>• Chronic myeloid leukemia</li> <li>• Colorectal cancer</li> <li>• ECM-receptor interaction</li> <li>• Endometrial cancer</li> <li>• ErbB signaling pathway</li> <li>• Focal adhesion</li> <li>• Gap junction</li> <li>• Glioma</li> <li>• GnRH signaling pathway</li> <li>• Insulin signaling pathway</li> <li>• MAPK signaling pathway</li> <li>• Melanoma</li> <li>• mTOR signaling pathway</li> <li>• Pancreatic cancer</li> <li>• Prostate cancer</li> <li>• Regulation of actin cytoskeleton</li> <li>• Small cell lung cancer</li> <li>• TGF-beta signaling pathway</li> <li>• Toll-like receptor signaling pathway</li> <li>• Type II diabetes mellitus</li> <li>• Ubiquitin mediated proteolysis</li> </ul> | <ul style="list-style-type: none"> <li>• Adipocytokine signaling pathway</li> <li>• Alzheimer's disease</li> <li>• Aminoacyl-tRNA biosynthesis</li> <li>• Aminosugars metabolism</li> <li>• B cell receptor signaling pathway</li> <li>• Base excision repair</li> <li>• Biosynthesis of steroids</li> <li>• Dentatorubropallidolusian atrophy (DRPLA)</li> <li>• DNA replication</li> <li>• Fatty acid elongation in mitochondria</li> <li>• Fructose and mannose metabolism</li> <li>• Glycan structures - biosynthesis</li> <li>• Glycan structures - degradation</li> <li>• Glycine, serine and threonine metabolism</li> <li>• Glycosylphosphatidylinositol(GPI)- anchor biosynthesis</li> <li>• Homologous recombination</li> <li>• Inositol phosphate metabolism</li> <li>• Long-term potentiation</li> <li>• Lysine degradation</li> <li>• Mismatch repair</li> <li>• N-Glycan biosynthesis</li> <li>• Nicotinate and nicotinamide metabolism</li> <li>• Non-homologous end-joining</li> <li>• Non-small cell lung cancer</li> <li>• Nucleotide excision repair</li> <li>• Oxidative phosphorylation</li> <li>• p53 signaling pathway</li> <li>• Parkinson's disease</li> <li>• Pentose phosphate pathway</li> <li>• Phosphatidylinositol signaling system</li> <li>• Proteasome</li> <li>• Purine metabolism</li> <li>• Pyrimidine metabolism</li> <li>• Regulation of autophagy</li> <li>• Renal cell carcinoma</li> <li>• Ribosome</li> <li>• SNARE interactions in vesicular transport</li> </ul> |

|  |  |                                                                                                                                                                                                                 |
|--|--|-----------------------------------------------------------------------------------------------------------------------------------------------------------------------------------------------------------------|
|  |  | <ul style="list-style-type: none"><li>• Thyroid cancer</li><li>• Tight junction</li><li>• Valine, leucine and isoleucine degradation</li><li>• VEGF signaling pathway</li><li>• Wnt signaling pathway</li></ul> |
|--|--|-----------------------------------------------------------------------------------------------------------------------------------------------------------------------------------------------------------------|

Table S5: Antibodies used in this study

| ANTIBODIES                           | SOURCE                      | IDENTIFIER  |
|--------------------------------------|-----------------------------|-------------|
| anti-Notch1                          | Abcam                       | ab52627     |
| anti-Notch1                          | Abcam                       | ab8925      |
| anti-Notch1                          | Cell Signaling Technologies | CST4147     |
| anti-Notch2                          | Cell Signaling Technologies | CST4530     |
| anti-Notch3                          | Abcam                       | ab23426     |
| anti-Notch4                          | Cell Signaling Technologies | CST2423     |
| anti-Hes1                            | R&D Systems                 | AF3317      |
| anti-Hes1                            | Cell Signaling Technologies | CST11988    |
| anti-DLL1                            | R&D Systems                 | AF 5026     |
| anti-DLL3                            | Cell Signaling Technologies | CST2483     |
| anti-Jagged1                         | Abcam                       | ab7771      |
| anti-ABCA3                           | Seven Hills Bioreagents     | WMAB-17G524 |
| anti-proSP-C                         | Seven Hills Bioreagents     | WRAB-9932   |
| anti-proSP-C                         | SantaCruz                   | sc-7706     |
| anti-mature SP-C                     | Seven Hills Bioreagents     | WRAB-76694  |
| anti-mature SP-C (recombinant human) | Nycomed                     | N/A         |
| anti-proSP-B                         | Millipore                   | AB3430      |
| anti-mature SP-B                     | Seven Hills Bioreagents     | WRAB-48604  |
| anti-Beta-Tubulin                    | Sigma                       | T0198       |
| anti-Beta-Actin                      | Abcam                       | ab8227      |
| anti-Beta-Actin                      | Abcam                       | ab8226      |
| anti-PCNA                            | Abcam                       | ab18197     |
| anti-PCNA                            | SantaCruz                   | sc-56       |
| anti-phospho Histone H3              | Abcam                       | ab5176      |
| anti-Ki67                            | Abcam                       | ab15580     |
| anti-Collagen I                      | Meridian Life Sciences      | T40777R     |

|                                    |                        |             |
|------------------------------------|------------------------|-------------|
| anti-Collagen I                    | Rockland               | 600-401-103 |
| anti-Vimentin                      | Abcam                  | ab92547     |
| anti-Vimentin                      | SantaCruz              | sc58901     |
| anti-alpha SMA                     | Abcam                  | ab119952    |
| anti-alpha SMA                     | Abcam                  | ab5694      |
| anti-Cre recombinase               | Biolegend              | 908001      |
| anti-GFP                           | Millipore              | AB16901     |
| anti-GFP                           | Abcam                  | ab5450      |
| anti-EpCAM Pe-Cy7                  | Biolegend              | 324222      |
| anti-CD45 APC-Cy7                  | Biolegend              | 304016      |
| anti-CD31 APC-Cy7                  | Biolegend              | 303120      |
| anti-CD16/32 (biotinylated)        | BD Biosciences         | 553143      |
| anti-CD45 (biotinylated)           | BD Biosciences         | 553078      |
| anti-CD31 (biotinylated)           | BD Biosciences         | 553371      |
| anti-Cathepsin H                   | Abcam                  | ab7432      |
| anti-Cathepsin H                   | St Cruz                | sc6496      |
| anti-Napsin A                      | Abcam                  | ab9868      |
| anti-anti-TTF1                     | Upstate/Millipore      | 07-601      |
| anti-Chop                          | St Cruz                | sc575       |
| Donkey anti-rabbit Alexa-Fluor 488 | ThermoFisherScientific | A21206      |
| Donkey anti-rabbit Alexa-Fluor 555 | ThermoFisherScientific | A31572      |
| Donkey anti-rabbit Alexa-Fluor 647 | ThermoFisherScientific | A31573      |
| Donkey anti-mouse Alexa-Fluor 488  | ThermoFisherScientific | A21202      |
| Donkey anti-mouse Alexa-Fluor 555  | ThermoFisherScientific | A31570      |
| Donkey anti-mouse Alexa-Fluor 647  | ThermoFisherScientific | A31571      |
| Donkey anti-goat Alexa-Fluor 488   | ThermoFisherScientific | A11055      |
| Donkey anti-goat Alexa-Fluor 555   | ThermoFisherScientific | A21432      |
| Donkey anti-goat Alexa-Fluor 647   | ThermoFisherScientific | A21447      |

|                                                          |                            |         |
|----------------------------------------------------------|----------------------------|---------|
| Donkey anti-chicken Alexa-Fluor 488                      | ThermoFisherScientific     | A11039  |
| Donkey anti-chicken Alexa-Fluor 555                      | ThermoFisherScientific     | A21437  |
| Anti-mouse F(ab') <sub>2</sub> Fragment Alexa Fluor 488  | Cell SignalingTechnologies | CST4408 |
| Anti-mouse F(ab') <sub>2</sub> Fragment Alexa Fluor 555  | Cell SignalingTechnologies | CST4409 |
| Anti-rabbit F(ab') <sub>2</sub> Fragment Alexa Fluor 488 | Cell SignalingTechnologies | CST4412 |
| Anti-rabbit F(ab') <sub>2</sub> Fragment Alexa Fluor 555 | Cell SignalingTechnologies | CST4413 |
| HRP-conjugated rabbit anti–mouse IgG                     | DakoCytomation             | P0260   |
| HRP-conjugated rabbit anti–goat IgG                      | DakoCytomation             | P0160   |
| HRP-conjugated rabbit anti–sheep IgG                     | DakoCytomation             | P0163   |
| HRP-conjugated swine anti–rabbit IgG                     | DakoCytomation             | P0217   |



Table S6. Chemicals, peptides and recombinant proteins used in this study

| CHEMICALS, PEPTIDES, PROTEINS                  | SOURCE                  | IDENTIFIER           |
|------------------------------------------------|-------------------------|----------------------|
| Bleomycinsulfate, injection solution 15,000 U  | Hexal                   | ATC code:<br>L01DC01 |
| Pepstatin A (napsin-A inhibitor)               | Applichem               | A2205                |
| PMSF                                           | Sigma-Aldrich           | P7626                |
| DAPT                                           | Selleckchem             | S2215                |
| E-64                                           | Sigma-Aldrich           | E3132                |
| Fetal bovine serum (FBS)                       | PAA                     | S0615                |
| Bovine serum albumin (BSA)                     | Roth                    | 80763                |
| Human Serum                                    | Biochrom                | S01049               |
| Donkey serum                                   | Jackson Immuno Research | 017-000-001          |
| hydro- $\beta$ -estradiole                     | Sigma-Aldrich           | E2758                |
| hydrocortisone                                 | Sigma-Aldrich           | H0888                |
| ITS solution: insulin, transferrin Na-selenite | PAN Biotech             | P07-03100            |
| L-Glutamine, 200 mM                            | Gibco                   | 25030-024            |
| Penicillin/Streptomycin                        | Gibco                   | 15140-122            |
| Dispase                                        | BD Biosciences          | 354235               |
| Dispase 1:10 dilution                          | Roche                   | 04942086001          |
| Low-melting-point agarose                      | Sigma-Aldrich, Biorad   | 161-3111             |
| DNase I                                        | Sigma-Aldrich           | DN25-1G              |
| Na-deoxycholate                                | Sigma Aldrich           | 30970-100G           |
| DMSO                                           | Sigma Aldrich           | D-8418               |
| Triton X-100                                   | Sigma Aldrich           | T8787                |
| Tween-20                                       | Sigma Aldrich           | P8074                |
| EDTA, disodium salt (Titrplex III)             | Merck                   | 108418               |
| Sodium dodecyl sulfate, SDS                    | Roth                    | CN30.3               |
| $\beta$ -mercaptoethanol                       | Sigma-Aldrich           | M6250                |

|                                                                                 |                          |             |
|---------------------------------------------------------------------------------|--------------------------|-------------|
| Acrylamide/bis-acrylamide solution, Rotiphorese Gel 30                          | Roth                     | 3029.1      |
| ECL Plus western blotting substrate                                             | GE Healthcare            | RPN2133     |
| Immobilon western chemiluminescent HRP substrate                                | Millipore                | WBKLS0500   |
| 4,6-Diamidino-2-phenylindole dihydrochloride (DAPI)                             | Sigma-Aldrich            | D9542       |
| Sudan black                                                                     | Sigma-Aldrich            | 199664-25G  |
| Fluorescence Mounting Medium                                                    | DakoCytomation           | S3023       |
| Vectashield with DAPI                                                           | Vector Laboratories      | H-1200      |
| Glycergel Mounting Medium                                                       | DakoCytomation           | C0563       |
| Mayer's hemalaun solution                                                       | Waldeck-Chroma           | 2E-038      |
| lyso-phosphatidylcholine (HPTLC standard)                                       | Sigma-Aldrich            | L4129       |
| Sphingomyelin (HPTLC standard)                                                  | Sigma-Aldrich            | S0756       |
| Phosphatidylcholine (HPTLC standard)                                            | Sigma-Aldrich            | P4139       |
| Phosphatidylserine (HPTLC standard)                                             | Sigma-Aldrich            | P0474       |
| Phosphatidylethanolamine (HPTLC standard)                                       | Sigma-Aldrich            | P3511       |
| Phosphatidylglycerol (HPTLC standard)                                           | Sigma-Aldrich            | P8318       |
| Cardiolipin (HPTLC standard)                                                    | Sigma-Aldrich            | C0563       |
| Lipofectamine 2000                                                              | Invitrogen               | 1668027     |
| [3H]thymidine                                                                   | PerkinElmer              | NET355001MC |
| Napsin A fluorogenic substrate MGAS-1 (Qx1520-KKTSVLMAAPQ-Lys-HiLyte Fluor 488) | AnaSpec                  | MGAS-1      |
| Lysotracker Green                                                               | Thermo Fisher Scientific | L7526       |
| Matrigel, growth factor reduced                                                 | Corning                  | 356231      |

Table S7. Commercial assays used in this study

| COMMERCIAL ASSAYS                                                  | SOURCE                                        | IDENTIFIER  |
|--------------------------------------------------------------------|-----------------------------------------------|-------------|
| RNeasy kit (total RNA isolation)                                   | Qiagen                                        | 74106       |
| Omniscript-RT-Kit (reverse transcription)                          | Qiagen                                        | 205113      |
| iQ SYBR Green Supermix Kit (qPCR)                                  | Bio-Rad                                       | 1708880     |
| Human Gene Expression 4x44K Microarray Kit                         | Agilent Technologies                          | G4112A      |
| Mouse Gene Expression 4x44K Microarray Kit                         | Agilent Technologies                          | G4122F      |
| Backing slides                                                     | Agilent Technologies                          | G2534-60012 |
| BD Atlas SMART Fluorescent Probe Amplification Kit<br>(microarray) | Clontech Laboratories,<br>Heidelberg, Germany | K1861-1     |
| QIAquick PCR Purification Kit (labeled DNA purification)           | Qiagen                                        | 28104       |
| QuickAmp labeling kit (v. 5.7)                                     | Agilent                                       | 5190-0444   |
| Hi-RPM GE Hybridization Kit                                        | Agilent                                       | 5190-0404   |
| Gene Expression Wash Buffer Kit                                    | Agilent                                       | 5188-5327   |
| Stabilization and Drying Solution                                  | Agilent                                       | 5185-5979   |
| DNeasy Blood & Tissue Kit (DNA isolation)                          | Qiagen                                        | 69504       |
| Big Dye Terminator Mix (Sequencing)                                | Applied Biosystems                            | 4337455     |
| Pierce BCA protein assay                                           | Thermo Fisher Scientific                      | 23227       |
| ZytoChem-Plus AP Kit (Fast Red IHC staining kit)                   | Zytomed Systems                               | AP008RED    |
| ProSP-B ECLIA                                                      | Roche/ This paper                             | N/A         |

Table S 8. Oligonucleotides used in this study

| OLIGONUCLEOTIDES                                                                                                            | SOURCE        | IDENTIFIER                        |
|-----------------------------------------------------------------------------------------------------------------------------|---------------|-----------------------------------|
| Pofut1 siRNA DharmaFECT                                                                                                     | Thermo Fisher | Cat# 059834-01 and D-001210-03-05 |
| siRNA Napsa targeting: 5'-GGA CCA AGU UUG CCA UUC AUU-3'(sense), 5'-P-UGA AUG GCA AAC UUG GUC CUU-3' (antisense)            | Dharmacon     | D-001210-01-05                    |
| siRNA non-targeting: 5'- UAG CGA CUA AAC ACA UCA AUU -3'(sense), 5'- P- UUG AUG UGU UUA GUC GCU AUU-3' (ANM_005411ntisense) | Dharmacon     | D-046905-02                       |
| RT-PCR Primer human SFTPA: Forward, 5'- ATC TAG ATG AGG AGC TCC AAG C-3'; Reverse, 5'- CCT CAG TCA GGC CTA CAT AGG - 3'     |               | NM_005411                         |
| RT-PCR Primer human SFTPB: Forward 5'- AAG TGC TTG ACG ACT ACT TCC - 3', Reverse 5'- GCT TGG ATC CGC TTG ATC AG - 3'        |               | NM_198843                         |
| RT-PCR Primer human SFTPC: Forward 5'- CTC ATC GTC GTG GTG ATT GTG - 3', Reverse 5'- CTG CAG AGA GCA TTC CAT CTG - 3'       |               | NM_003018                         |
| RT-PCR Primer human SFTPD: Forward 5'- CCA CAG AAC AAT GCC CAG TG - 3', Reverse 5'- TTG CCC TGA GGT CCT ATG TTC - 3'        |               | NM_003019                         |
| RT-PCR Primer human NAPSA: Forward 5'- TCA CCT TCG TGC CAG TCA C - 3', Reverse 5'- TCG AAG ACG GCC ACA TAC G - 3'           |               | NM_004851                         |
| RT-PCR Primer human CTSH: Forward 5'- CCA TCG CAA CCG GAA AGA TG - 3', Reverse 5'- ACA TCA TGA AGT CCT GAG TCA C - 3'       |               | NM_004390                         |
| RT-PCR Primer human ATP1B1: Forward 5'- AGC CCA GAG GGA TGA CAT G - 3', Reverse 5'- TCC TTA TCT TCA TCT CGC TTG C - 3'      |               | NM_001677                         |
| RT-PCR Primer human ABCA3: Forward 5'- CTT CAT CAT GCC CTC CTA TTG G - 3', Reverse 5'- TGA TGT ATG CCC GTC CAC TG - 3'      |               | NM_001089                         |
| RT-PCR Primer human SCGB1A1: Forward 5'- TCC GCT TCT GCA GAG ATC TG - 3', Reverse 5'- GTG TCC ACC AGC TTC TTC AG - 3'       |               | NM_003357                         |

|                                                                                                                      |            |             |
|----------------------------------------------------------------------------------------------------------------------|------------|-------------|
| RT-PCR Primer human ACTB: Forward 5'- ACC CTG AAG TAC CCC ATC G - 3', Reverse 5'- CAG CCT GGA TAG CAA CGT AC - 3'    |            | NM_001101   |
| RT-PCR Primer mouse spliced XBP1: Forward 5'- AGC TTT TAC GGG AGA AAA CTC A-3', Reverse 5'- GCC TGC ACC TGC TGC G-3' |            | NM_013842   |
| qPCR Primer mouse Notch 1: Forward 5'- atggcttcgactgccagctcac-3', Reverse 5'- tcggcactgttacagccctggt-3'              |            | NM_008714.3 |
| qPCR Primer mouse Notch 2: Forward 5'- gggcagctgctgcaataat-3', Reverse 5'- tttggccgcttcataacttc-3                    |            | NM_010928.2 |
| qPCR Primer mouse Notch 3: Forward 5'- cagccacgtgtcttgaccgaa-3', Reverse 5'- tgggctgctctgacattcgtcg-3'               |            | NM_008716.2 |
| qPCR Primer mouse Notch 4: Forward 5'- tctggatgtggacacctgtggacc-3', Reverse 5'- tctctgtggactagcccccagtcgt-3'         |            | NM_010929.2 |
| qPCR Primer mouse DLL1: Forward 5'- gccttcagcaaccccat-3', Reverse 5'- tgttgcgaggtcatcgg-3                            |            | NM_007865.3 |
| qPCR Primer mouse DLL4: Forward 5'- tgcttgggaagtatcctcac-3', Reverse 5'- tagagtcctgggagagcaa-3'                      |            | NM_019454.3 |
| qPCR Primer mouse Jagged 1: Forward 5'- actgggctgacaaatacca-3', Reverse 5'- tgaggaggtctccttgag-3'                    | This paper | NM_013822.5 |
| qPCR Primer mouse Jagged 2: Forward 5'- gcctcctcctgctgctttgtga-3', Reverse 5'- atcaggctgctgtcaggcaggt-3'             | This paper | NM_010588.2 |
| qPCR Primer mouse HES1: Forward 5'- ctgcagcgggagcagatgac-3', Reverse 5'- acacgtggacaggaagcggg-3'                     | This paper | NM_008235.2 |
| qPCR Primer mouse HEY1: Forward 5'- ccacgctccgccaccatgaa-3', Reverse 5'- cggcgttctcgatgctcct-3'                      | This paper | NM_010423.2 |
| qPCR Primer mouse HEY2: Forward 5'- tcgcatgaagcgccttgt-3', Reverse 5'- tcaactgagctttagcgtgcc-3'                      | This paper | NM_013904   |

|                                                                                                                           |            |             |
|---------------------------------------------------------------------------------------------------------------------------|------------|-------------|
| qPCR Primer mouse beat actin: Forward 5'-<br>ctacagcttcaccaccacag-3', Reverse 5'-<br>ctcgttgccaatagtgatgac-3'             | This paper | NM_007393   |
| qPCR Primer human Notch 1: Forward 5'-<br>atggacgtcaatgtccgc-3', Reverse 5'-<br>ccctggtagatgaagtcgga-3'                   | This paper | NM_017617.3 |
| qPCR Primer human Notch 2: Forward 5'-<br>catggccaatagcaatcctt-3', Reverse 5'-<br>tcacaacgaggtcctgcata-3'                 | This paper | NM_024408.3 |
| qPCR Primer human Notch 3: Forward 5'-<br>ccgatgtcaacgagtgctg-3', Reverse 5'-<br>aatgtccacctcgcaatagg-3'                  | This paper | NM_000435.2 |
| qPCR Primer human Notch 4: Forward 5'-<br>gaccagaaagacaaggccaa-3', Reverse 5'-<br>aaccacgtcacacacacat-3'                  | This paper | NM_004557.3 |
| qPCR Primer human DLL1: Forward 5'-<br>gaatctgtgtggagagcttcaat-3', Reverse 5'-<br>gtcgactccttcagtctgcc-3'                 | This paper | NM_005618.3 |
| qPCR Primer human DLL4: Forward 5'-<br>tctgaccacagctaggag-3', Reverse 5'-<br>tctcgtcatcatcgaagc-3'                        | This paper | NM_019074.3 |
| qPCR Primer human Jagged 1: Forward 5'-<br>caagtgccaccgtttctaca-3', Reverse 5'-<br>agtcgggaggcaaatcac-3'                  | This paper | NM_000214.2 |
| qPCR Primer human Jagged 2: Forward 5'-<br>gatccccggagcaaatgg-3', Reverse 5'-<br>ggccacctggacaataactg-3'                  | This paper | NM_145159.1 |
| qPCR Primer human beat actin: Forward 5'-<br>acagagcctcgcctttgccg-3', Reverse 5'-<br>acatgccggagccggtgtcg-3'              | This paper | NM_007393   |
| Primer cloning mouse Notch 1: Forward 5'- CGT<br>GGC TCC ATT GTC TAC CT- 3', Reverse 5'- CAC<br>ACA GGG AAC TTC ACC CT-3' | This paper | NM_008714.3 |

|                                                                                                                                                                                                                                                                                                                                                                                                                                                                                                                                                                                                                                                                                                                                         |                   |                  |
|-----------------------------------------------------------------------------------------------------------------------------------------------------------------------------------------------------------------------------------------------------------------------------------------------------------------------------------------------------------------------------------------------------------------------------------------------------------------------------------------------------------------------------------------------------------------------------------------------------------------------------------------------------------------------------------------------------------------------------------------|-------------------|------------------|
| <p>NAPSA Genotyping, Primers for PCR amplification of fragments:</p> <p><i>promoter - exon 1</i>: Forward 5-CTGACAGCAGCTGAAGGATG-3, Reverse 5-CTAGGGATCCTGGGTGCCAA-3</p> <p><i>exon 2 + 3</i>: Forward 5-ACTATTGTAGTGCCTTGGAG-3, Reverse 5-AGCCTCTGAGAAGCTGAGGT-3</p> <p><i>exon 4</i>: Forward 5-GACCTCAGCTTCTCAGAGGC-3, Reverse 5-ATTGGCTTGGGAAGCTCCTC-3</p> <p><i>exon 5</i>: Forward 5-CTAGGAAGTTGGGGCTTGCA-3, Reverse 5-GGTCAGTGA CTTCCTGAAGG-3</p> <p><i>exon 6 + 7</i>: Forward 5-CCTGGCAATACCTAGGGCTG-3, Reverse 5-CTGTCAA ACTGCCATCAGCC-3</p> <p><i>exon 8</i>: Forward 5-GGAGCCACGGAAGGGACTG-3, Reverse 5-CAACAACTGCCATCACAGG-3</p> <p><i>exon 9</i>: Forward 5-GTCCTTGTGGCCGCGACACC-3, Reverse 5-AGCAACCCAGGCAGGTTTCGC-3</p> | <p>This paper</p> | <p>NM_004851</p> |
|-----------------------------------------------------------------------------------------------------------------------------------------------------------------------------------------------------------------------------------------------------------------------------------------------------------------------------------------------------------------------------------------------------------------------------------------------------------------------------------------------------------------------------------------------------------------------------------------------------------------------------------------------------------------------------------------------------------------------------------------|-------------------|------------------|

|                                                                                                                                                                                                                                                                                                                                                                                                                                                                                                                                                                                                                                                                                                                                                                                       |                   |                  |
|---------------------------------------------------------------------------------------------------------------------------------------------------------------------------------------------------------------------------------------------------------------------------------------------------------------------------------------------------------------------------------------------------------------------------------------------------------------------------------------------------------------------------------------------------------------------------------------------------------------------------------------------------------------------------------------------------------------------------------------------------------------------------------------|-------------------|------------------|
| <p>NAPSA Genotyping, Primers for DNA Sequencing</p> <p><i>promoter - exon 1:</i> 5-<br/>CTGACAGCAGCTGAAGGATG-3</p> <p><i>promoter - exon 1:</i> 5-<br/>CTAGGGATCCTGGGTGCCAA-3</p> <p><i>exon 2 + 3:</i> 5-ACTATTGTAGTGCCTTGGAG-3</p> <p><i>exon 2 + 3:</i> 5-AGCCTCTGAGAAGCTGAGGT-3</p> <p><i>exon 4:</i> 5-GACCTCAGCTTCTCAGAGGC-3</p> <p><i>exon 4:</i> 5-ATTGGCTTGGGAAGCTCCTC-3</p> <p><i>exon 5:</i> 5-CTAGGAAGTTGGGGCTTGCA-3</p> <p><i>exon 5:</i> 5-GGTCAGTGACTTCCTGAAGG-3</p> <p><i>exon 6 + 7:</i> 5-CCTGGCAATACCTAGGGCTG-3</p> <p><i>exon 6 + 7:</i> 5-CTGTCAAACCTGCCATCAGCC-3</p> <p><i>exon 8:</i> 5-GGAGCCACGGAAGGGACTG-3</p> <p><i>exon 8:</i> 5-CAACAAACTGCCATCACAGG-3</p> <p><i>exon 9:</i> 5-GTCCTTGTGGCCGCGACACC-3</p> <p><i>exon 9:</i> 5-AGCAACCCAGGCAGGTTCGC-3</p> | <p>This paper</p> | <p>NM_004851</p> |
| <p>SFTPB Genotyping, Primers for PCR amplification of fragments:</p> <p><i>promoter - exon 2:</i> Forward 5-<br/>CCTGGGTCTGCCCTTCCAGG-3, Reverse 5-<br/>TCCTCCTGCCCATCCAGAGC-3</p> <p><i>exon 3 + 4:</i> Forward 5-<br/>CAAGTTGGGCTGGTGGGCAG-3, Reverse5-<br/>TGTGTGTGGCTCCCCCATGG-3</p> <p><i>exon 5 + 6:</i> Forward 5-<br/>CCCTAAAGTCCCCACACAGC-3, Reverse 5-<br/>TACCAGGCCTGAGCCTGAGC-3</p> <p><i>exon 7 + 8:</i> Forward 5-<br/>GTAGGTCTGAAGCTGGCTCC-3, Reverse 5-<br/>GTCTGTGCTCCATTCTGGCC-3</p> <p><i>exon 9 + 10:</i> Forward 5-<br/>GTCCTCCGTCTCCAGTGTCG-3, Reverse 5-<br/>GTTGGGCACTCAGTGAAGTGG-3</p>                                                                                                                                                                       | <p>This paper</p> | <p>NM_198843</p> |



|                                                                                                                                                                                                                                                                                                                                                                                                                                                                                                                                           |                   |                  |
|-------------------------------------------------------------------------------------------------------------------------------------------------------------------------------------------------------------------------------------------------------------------------------------------------------------------------------------------------------------------------------------------------------------------------------------------------------------------------------------------------------------------------------------------|-------------------|------------------|
| <p>SFTPB Genotyping, Primers for DNA Sequencing</p> <p><i>exon 1:</i> 5-ACCAGATGCCCTCCACCCTC-3</p> <p><i>exon 2:</i> 5-CCTCTCCTAGGCAGCTCCAC-3</p> <p><i>exon 3:</i> 5-CTGCATGTGCCTTGGAGTGC-3</p> <p><i>exon 4:</i> 5-TCGTGAACTCCAGCACCTG-3</p> <p><i>exon 5:</i> 5-TCCAGTGGTCCCTGAGCCCT-3</p> <p><i>exon 6:</i> 5-GAGATCCAGAGGGCTAGAGC-3</p> <p><i>exon 7:</i> 5-CCTGCATCCCCTGGACTCTC-3</p> <p><i>exon 8:</i> 5-CTACCCTGCCACTGCATGAC-3</p> <p><i>exon 9:</i> 5-AGCCAGAGGTGTTCCGTGAG-3</p> <p><i>exon 10:</i> 5-CATCTCACCTCCTCAGGCTC-3</p> | <p>This paper</p> | <p>NM_198843</p> |
| <p>SFTPC Genotyping, Primers for PCR amplification of fragments:</p> <p><i>promoter - exon 1:</i> Forward 5'-GTTGGAAGTGGTCCTTGCAGG-3', Reverse 5'-TCCCCATA-CTCAGG-CCTCTG-3'</p> <p><i>exon 2 - exon 4:</i> Forward 5'-GCCTCATGACCTCATGCCTG-3', Reverse 5'-AGCTTA-GACGTAGGCACTGC-3'</p> <p><i>exon 5:</i> Forward 5'-GTCCCACAATAAGGGC-TGCAC-3', Reverse 5'-CTGGGACAGAGGGCGAATGG-3'</p>                                                                                                                                                     | <p>This paper</p> | <p>NM_003018</p> |

|                                                                                                                                                                                                                                                                                                                                                                                                                                                                                                                                                                                             |                   |                  |
|---------------------------------------------------------------------------------------------------------------------------------------------------------------------------------------------------------------------------------------------------------------------------------------------------------------------------------------------------------------------------------------------------------------------------------------------------------------------------------------------------------------------------------------------------------------------------------------------|-------------------|------------------|
| <p>SFTPC Genotyping, Primers for DNA Sequencing</p> <p><i>promoter + exon1: 5'-<br/>CCCAGGTTTGCTCTTGCTGG-3'</i></p> <p><i>promoter + exon1: 5'-<br/>GAGGAGGCAGGGCCCATCAC-3'</i></p> <p><i>exon 2: 5'-TCCAGCCCTAGGACGCCGTG-3',</i></p> <p><i>exon 2: 5'-CTGTCTGGCATGTCCTGTGC-3'</i></p> <p><i>exon 3: 5'-GATGGGTACCACTGGCTGAG-3',</i></p> <p><i>exon 4: 5'-TGGGTCAGGGAGAGAGCAGG-3',</i></p> <p><i>exon 4: 5'-CACTCCTCCCAGCAGCCCTG-3'</i></p> <p><i>exon 5: 5'-GTCCCACAATAAGGGCTGCAC-3'</i></p> <p><i>exon 5: 5'-GGGAGTGGGAAGTACCGGTC-3'</i><i>exon<br/>6: 5'-CTGGGACAGAGGGCGAATGG-3'</i></p> | <p>This paper</p> | <p>NM_003018</p> |
|---------------------------------------------------------------------------------------------------------------------------------------------------------------------------------------------------------------------------------------------------------------------------------------------------------------------------------------------------------------------------------------------------------------------------------------------------------------------------------------------------------------------------------------------------------------------------------------------|-------------------|------------------|
